# Supplementary material for: Spatial Heterogeneity and Complexity of the Impact of Extreme Climate on Vegetation in China
Source: MDPI journal article supplement (doi:10.3390/su13105748), 2021-05-20
Supplement: s1 [file s1]

**Table S1.** Definitions of the 27 extreme climate indices of ETCCDI and the results of correlation analysis.

| Indices         | Definition                                                                                                 | Unit | Correlation Coefficient with NDVI |
|-----------------|------------------------------------------------------------------------------------------------------------|------|-----------------------------------|
| TX <sub>x</sub> | Monthly maximum value of daily maximum temperature                                                         | °C   | 0.378 **                          |
| TN <sub>x</sub> | Monthly maximum value of daily minimum temperature                                                         | °C   | 0.503 **                          |
| TX <sub>n</sub> | Monthly minimum value of daily maximum temperature                                                         | °C   | 0.483 **                          |
| TN <sub>n</sub> | Monthly minimum value of daily minimum temperature                                                         | °C   | 0.608 **                          |
| TX90p           | Percentage of days when daily maximum temperature (TX) < 10 <sup>th</sup> percentile                       | %    | 0.229 **                          |
| TN90p           | Percentage of days when daily minimum temperature (TN) > 90 <sup>th</sup> percentile                       | %    | -0.114 **                         |
| TX10p           | Percentage of days when TX < 10 <sup>th</sup> percentile                                                   | %    | 0.284 **                          |
| TN10p           | Percentage of days when TN < 10 <sup>th</sup> percentile                                                   | %    | 0.195 **                          |
| DTR             | Daily temperature range                                                                                    | °C   | -0.601 **                         |
| GSL             | Growing season length                                                                                      | d    | 0.659 **                          |
| FD              | Number of frost days                                                                                       | d    | -0.416 **                         |
| ID              | Number of icing days                                                                                       | d    | -0.194 **                         |
| SU              | Number of summer days                                                                                      | d    | 0.450 **                          |
| TR              | Number of tropical nights                                                                                  | d    | 0.535 **                          |
| WSDI            | Warm spell duration index                                                                                  | d    | -0.0003                           |
| CSDI            | Cold spell duration index                                                                                  | d    | -0.045                            |
| RX1day          | Monthly maximum 1-day precipitation                                                                        | mm   | 0.705 **                          |
| RX5day          | Monthly maximum consecutive 5-day precipitation                                                            | mm   | 0.718 **                          |
| SDII            | Simple precipitation intensity index                                                                       | mm/d | 0.615 **                          |
| R10mm           | Annual count of days when precipitation (PRCP) ≥ 10mm                                                      | d    | 0.782 **                          |
| R20mm           | Annual count of days when PRCP ≥ 20mm                                                                      | d    | 0.738 **                          |
| R50mm           | Annual count of days when PRCP ≥ 50mm                                                                      | d    | 0.611 **                          |
| CDD             | Maximum length of dry spell, maximum number of consecutive days with daily precipitation amount (RR) < 1mm | d    | -0.530 **                         |
| CWD             | Maximum length of wet spell, maximum number of consecutive days with RR ≥ 1mm                              | d    | 0.694 **                          |
| R95pTOT         | Annual total PRCP when RR > 95p                                                                            | mm   | 0.473 **                          |
| R99pTOT         | Annual total PRCP when RR > 99p                                                                            | mm   | 0.353 **                          |
| PRCPTOT         | Annual total precipitation in wet days                                                                     | mm   | 0.745 **                          |

Indices information come from [http://etccdi.pacificclimate.org/list\\_27\\_indices.shtml](http://etccdi.pacificclimate.org/list_27_indices.shtml). (accessed on 1 December 2020). \*\* The significance level was 0.01.

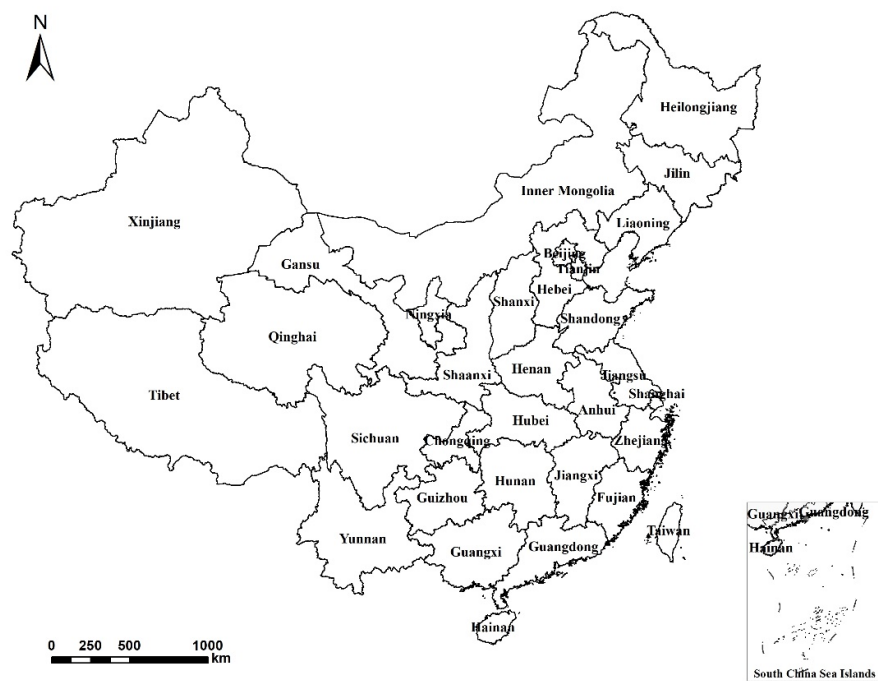

**Figure S1.** Map of provinces in China.
